# Supplementary material
Source: Research Square preprint supplement (doi:10.21203/rs.3.rs-8720894/v1)
Supplement: Supplementary file 1 [file 83812a58e92ecac3e28e7873.docx]

*Supplementary 1.0 : Socio-demographic characteristics of study participants*

| **Variable** | **Number(n)** | **Percentage (%)** |
| --- | --- | --- |
| **Age** | | |
| 18 - 24 |  |  |
| 25- 34 |  |  |
| 35-44 |  |  |
| 45+ |  |  |
| **Gender** | | |
| Male |  |  |
| Female |  |  |
| **Respondents’ category** | | |
| Health care workers (clinical) |  |  |
| Health care workers (Lab) |  |  |
| TB patients- DS-TB |  |  |
| TB patients DR-TB |  |  |
| Caretakers |  |  |
| Community health workers |  |  |
| Health managers |  |  |
| **Years in service (For health care workers and health managers only)** | | |
| <1 year |  |  |
| 1-4 years |  |  |
| 5+ years |  |  |
| **F*GD category*** | | |
| Patients |  |  |
| Health workers |  |  |
| Community health workers |  |  |

***FGD topic guide for TB patients and caretakers of TB patients*** ***(Version 1.0)***

FGD ID #: ______________ Moderator Initials: __________Note-taker Initials: __________

Participant group_____________ # of participants___________ Audio file # _____________

Country/Community: _____________________ Date of FGD ________________________

**Purpose:** provide questions to facilitate the collection of qualitative information on barriers and facilitators to access to TB care.

**Introduction provided by the facilitator**

- Organization(s) affiliated with activity
- Additional staff assisting or observing the discussion
- Activity short term purpose: To gather TB patients’ perspectives on experiences they go through in the process of accessing TB care so as to document the barriers and facilitators to access to TB care in the Ugandan context with a focus on Kampala, Mukono and Wakiso districts and two MDR-TB treatment centers (Mulago and Lira regional referral hospital).
- Activity long term purpose: To gather information to provide the USAID LPHS-TB Activity with a basis on which to develop context specific interventions.

**Ethical considerations**

- - Voluntary and anonymous participation with no names recorded and individual level information not shared.
  - You can choose to stop participating at any time. We expect not to spend more than 90 minutes during this discussion.
  - We will take notes during the discussion and will audio record when possible, to help capture your comments accurately and complete our notes. We will destroy the recordings after we make the notes.
  - Ask permission to take photos or record session.

**Introduction provided by the participants**

- Each participant should describe their background as it relates to the design of the focus group discussion.
- For example:
  - If the facilitator is talking with some group/ patients, healthcare workers or health managers etc.

| **Dimension** | **Definition of dimension** | **Questions** |
| --- | --- | --- |
| **Ability to perceive** | Denotes aspects of TB knowledge and relates to the fact that people facing health needs can actually identify that some ***form of services exist, can be reached, and have an impact on the health of the individual*** | 1) Tell me what you understand about TB.    Probes: Ask about participants’ understanding of   - TB signs and symptoms - How TB is spread - How TB is prevented - How TB is treated - Where to seek care. |
| 2) Do you know where people in your community can get tested for TB?    Probes: Ask about participants knowledge of     - Where TB testing is done in their community (nearest testing point/health facility) - What methods are used to test for TB. - How far the nearest testing site is from their home. |
| 3) What types of medicines are people in your community currently taking for TB?    Probes: Ask about participants knowledge of   - What medicine is used to treat TB - How often this medicine is taken. |
| 4) What challenges do people in the community usually face with starting and/or adhering to TB and other treatment?  Probes: Ask about the participants’ experiences with   - Linkage to TB treatment. - Taking TB medicines. Ever forget to take TB medicine? If so why? If not, what reminds them? - Taking both TB and ART medicines - Side-effects that TB patients get from their treatment and how these affect adherence - Personal, family, community, cultural and provider related factors affect TB treatment |
| 5)What do you think can be done differently to make it easier for patients to adhere to TB treatment?  Probes: Ask about   - Healthcare worker attitudes. Whether they feel healthcare workers give patients appropriate advice? Why/not? Whether healthcare workers understand patient’s concerns and respond to their questions? - What changes need to be made within and outside the facility for patients to adhere to treatment? - What kind of incentives will motivate patients to adhere to TB treatment? |
| **Ability to seek** | Relates to cultural and social factors determining the possibility for people to accept the aspects of the service and the judged appropriateness for the persons | Probes:   - What are community perceptions about TB illness - What are the community perceptions about TB testing? Is it effective or not? - How does the community feel about TB treatment?. Does the community feel TB treatment is beneficial? - How do people decide when to use herbalist for TB and when they use hospital care? |
| **Ability to reach** | Refer to the fact that health services (either the physical space or those working in health care roles) can be reached both physically and in a timely manner. | 1. Could you please tell us about your experience while receiving care at the health facility?   Probes   - Share about experience during TB screening. - Share about participants’ experiences with access to TB diagnosis. How long did it take? - Availability of diagnostics like x-rays and lab tests at their nearest health facilities. |
| **Ability to pay** | Reflects the economic capacity for people to spend resources and time to use appropriate services. | 1. How do patients pay for expenses related to seeking medical care (both medical and non-medical expenses?) medical expenses?   Probe:   - If yes, how much in total do people spend on expenses related to seeking medical care? - Where are the highest costs? Is it the costs for investigations? Treatment? Transport to hospital? - Do you feel patient TB medical expenses are affordable? Why/Why not? - Would you be willing to pay for TB services incase treatment was not free? |
| **Ability to engage** | denotes the fit between services and clients need, its timeliness, the amount of care spent in assessing health problems and determining the correct treatment and the technical and interpersonal quality of the services provided | 1. What is your opinion of your healthcare worker?   Probe: Do you feel like they   - give you appropriate advice? Why/not? - understand your concerns and respond to your questions? - understand your concerns? Why/not? - Make it easy for you to approach them? |
| **Recommendation(s)** |  | 11. What can be done to improve access to care to TB services |

*IDI topic guide for community health workers (Version 1.0)*

Participant ID # ___________ Interviewer_________ Audio file # ______ Date________

Participant type: VHT Volunteer Peer Mother CORP Other ______________ LC1

CLF

**Purpose:** provide questions to facilitate the collection of qualitative information on barriers and facilitators to access to TB care.

**Introduction provided by the facilitator**

- Organization(s) affiliated with activity
- Additional staff assisting or observing the discussion
- Activity short term purpose: To gather community health care workers perspectives on experiences they go through while in the community as they carry out TB activities in an effort to document barriers and facilitators to access to TB care in the Ugandan context with a focus on Kampala, Mukono and Wakiso districts.
- Activity long term purpose: To gather information to provide the USAID LPHS-TB Activity with a basis on which to develop context specific interventions.

**Ethical considerations**

- - Voluntary and anonymous participation with no names recorded and individual level information not shared.
  - You can choose to stop participating at any time. We expect not to spend more than 90 minutes during this discussion.
  - We will take notes during the interview and will audio record when possible, to help capture your comments accurately and complete our notes. We will destroy the recordings after we make the notes.
  - Ask permission to take photos or record session.

**Warm up question**

Please tell me about your job? Who you work for? What you do? And how long you have worked in that job for? Where have you worked?

Probe: Please briefly describe your role as far as TB services are concerned in your community.

| **Dimension** | **Definition of dimension** | **Questions** |
| --- | --- | --- |
| **Approachability** | Denotes aspects of TB knowledge and relates to the fact that people facing health needs can actually identify that some form of services exists, can be reached, and have an impact on the health of the individual | 1. How do you get information (about TB)?   Probe:   - Do you have access reference material while doing your work? Does it help? |
| 1. What activities do you implement to increase awareness about TB in the community? |
| **Acceptability** | Relates to cultural and social factors determining the possibility for people to accept the aspects of the service and the judged appropriateness for the persons | 1. What challenges do you face with your job?   Probes   - Specific challenges in relation supporting TB patients - Challenges or enhancers for identification of TB cases - Have you experienced stigma and discrimination as one of the challenges to TB case identification? Is this happening often? - Challenges or enhancers to treatment success |
| 1. Are there any social or cultural norms that prevent or aide members of your community to access TB services? Explain? |
| 1. How do community health workers feel about working with TB patients?   Probe for   - Experiences with TB screening and linkage to diagnosis? - Experiences with diagnosis and linkage to TB treatment - About aspects of TB stigma during care services? - What about during contact tracing? Acceptability of the process of contact tracing and that of taking TPT? - Perceived risk of community health workers when offering TB services |
| 1. What motivates you to work on TB patients? |
| **Availability and Accommodation** | Refer to the fact that health services (either the physical space or those working in health care roles) can be reached both physically and in a timely manner. | 1. Please describe how you support TB patients   Probe:   - how do you find or locate your clients? - What activities are carried out to identify TB cases in the community? - what services/information do you provide them? - how do you work with other health workers (e.g. for referrals, etc…) |
| What training do you receive? how often and by whom? |
| **Affordability** | Reflects the economic capacity for people to spend resources and time to use appropriate services. | N/A |
| **Appropriateness** | Denotes the fit between services and clients need, its timeliness, the amount of care spent in assessing health problems and determining the correct treatment and the technical and interpersonal quality of the services provided | 1. How do you generally feel about supporting TB patients? |
| Probe:   - what do you enjoy about your work? - what do you dislike about your work? - bout community perceptions about CHWs work? |
| 1. How motivated do you feel about supporting TB patients?     Probes:   - about financial incentives - about non-financial incentives - about non-financial intrinsic incentives, e.g. job satisfaction - about non-financial extrinsic incentives, e.g. recognition from community, impact on community - about equipment and supplies, workload, working environment, communication, equipment and transportation, safety, etc… - What resources are required to enable community activities for TB activities like household contact screening and referrals? |
| **Recommendation(s)** |  | 1. What do you think can be done differently to TB patients access care?   Probe:   - what changes within and outside the health facility would enable patients access TB treatment - what support do TB patients need to enable them access and adhere to treatment? - what kind of incentives will motivate TB patient’s access TB treatment and care? - about the role that community health workers can play to improve early presentation for TB treatment and care. |

*IDI topic guide for health workers and supervisors (Version 1)*

Participant ID # ___________ Interviewer_________ Audio file #: ____________ Date____

Participant type: Nurse Clinician TB supervisor other ___________

**Purpose:** provide questions to facilitate the collection of qualitative information on barriers and facilitators to access to TB care.

**Introduction provided by the facilitator**

- Organization(s) affiliated with activity
- Additional staff assisting or observing the discussion
- Activity short term purpose: To gather health workers/ supervisors’ perspectives on barriers and facilitators to access to TB care in the Ugandan context with a focus on Kampala, Mukono and Wakiso districts and two MDR -TB treatment centers (Mulago and Lira regional referral hospitals).
- Activity long term purpose: To gather information to provide the USAID LPHS-TB Activity with a basis on which to develop context specific interventions.

**Ethical considerations**

- - Voluntary and anonymous participation with no names recorded and individual level information not shared.
  - You can choose to stop participating at any time. We expect not to spend more than 45 minutes during this interview.
  - We will take notes during the discussion and will audio record when possible, to help capture your comments accurately and complete our notes. We will destroy the recordings after we make the notes.
  - Ask permission to take photos or record session.

**Introduction provided by the participants**

- Each participant should describe their background as it relates to the design of the interview.

**Warm up**

Please tell me about your job? Where you work? What you do? And how long you have worked in that job for?

Probe if participant’s work involves TB care and support

| **Dimension** | **Definition of dimension** | **Questions** |
| --- | --- | --- |
| **Approachability** | Denotes aspects of TB knowledge and relates to the fact that people facing health needs can actually identify that some form of services exists, can be reached, and have an impact on the health of the individual | Processes in place to disseminate TB knowledge to patients at the health facility? At the community?    Probe   - Information sharing including community dialogues, IEC materials, TB awareness campaigns, health education talks at the health facilities. - Differentiated messages for different patient populations - Identifying vulnerable groups? Interventions in place - Health facility navigation for people coming into health facilities from the community |
| **Acceptability** | Relates to cultural and social factors determining the possibility for people to accept the aspects of the service and the judged appropriateness for the persons | Please share your views on any social or cultural factors that affect or enhance access to TB care by members of the communities that you serve. |
| Please share your views on the health care worker attitudes towards TB?  Probe for   - how do you or other health workers feel about working with TB patients. Screening? Diagnosis? Treatment and follow up? - What is the perceived risk to health care workers of offering TB services |
| What motivates you to work for TB patients?  Probe about   - how TB patients are generally treated by health workers at the health facilities - aspects of TB stigma during delivery of care services? - Acceptability of the process of contact tracing and that of taking TPT? |
| **Availability and Accommodation** | Refer to the fact that health services (either the physical space or those working in health care roles) can be reached both physically and in a timely manner. | What opportunities are available to individual and communities to access TB services?    Probe for   - aspects for outreach activities, information sharing and screening in the communities, at the health facility, trained human resources to deliver TB care services. - Experience about TB diagnostics (lab and x-ray service availability in the health facility? - Availability of TB logistics including drugs, data collection and reporting tools |
| **Affordability** | Reflects the economic capacity for people to spend resources and time to use appropriate services. | How adequate is the funding for available for delivery of TB services in your district/hospital/ ***(to be administered to the health managers)*** |
| **Appropriateness** | Denotes the fit between services and clients need, its timeliness, the amount of care spent in assessing health problems and determining the correct treatment and the technical and interpersonal quality of the services provided | What is available in place to ensure patients are fully engaged and participate in their care.    Probes:   - Patient-provider relationship? attitudes? - are TB care services responsive to individual patients’ preferences, needs and values - Turn-around time services for test results - about challenges with adherence to TB care - about the side-effects that TB patients suffer from their treatment and how these affects adherence / How are they managed |
| What factors enhance or deter access and retention in care at the facility  Probe:   - Facility opening hours to provide TB services. - Appointment keeping mechanisms |
| **Recommendation(s)** |  | What do you think can be done differently to improve TB services in this community?  Probes:   - what changes would you like to be made within and outside the facility to help TB patients adhere to treatment? - what kind of incentives will motivate patients to adhere? |
| Is there anything else you would like to add to what we have discussed? |

*FGD topic guide for patients on TB preventive therapy (TPT)*

FGD ID #: ______________ Moderator Initials: __________Note-taker Initials: __________

Participant group_____________ # of participants___________ Audio file # _____________

Country/Community: _____________________ Date of FGD ________________________

**Purpose:** provide questions to facilitate the collection of qualitative information on barriers and facilitators to access to TB care.

**Introduction provided by the facilitator**

- Organization(s) affiliated with activity
- Additional staff assisting or observing the discussion
- Activity short term purpose: To gather TB patients’ perspectives on experiences they go through in the process of accessing TB care so as to document the barriers and facilitators to access to TB care in the Ugandan context with a focus on Kampala, Mukono and Wakiso districts and two MDR-TB treatment centers (Mulago and Lira regional referral hospital).
- Activity long term purpose: To gather information to provide the USAID LPHS-TB Activity with a basis on which to develop context specific interventions.

**Ethical considerations**

- - Voluntary and anonymous participation with no names recorded and individual level information not shared.
  - You can choose to stop participating at any time. We expect not to spend more than 90 minutes during this discussion.
  - We will take notes during the discussion and will audio record when possible, to help capture your comments accurately and complete our notes. We will destroy the recordings after we make the notes.
  - Ask permission to take photos or record session.

**Introduction provided by the participants**

- Each participant should describe their background as it relates to the design of the focus group discussion.
- For example:
  - If the facilitator is talking with some group/ patients, healthcare workers or health managers etc.

**Pre-amble:** TB preventive therapy involves taking medicines to prevent the development of TB in situations where one is categorized as being in a risk group. A person who is eligible for TPT does not have the signs and symptoms of TB disease and feels well.

| **Dimension** | **Definition of dimension** | **Questions** |
| --- | --- | --- |
| **Ability to perceive** | Denotes aspects of TB knowledge and relates to the fact that people facing health needs can actually identify that some form of services exists, can be reached, and have an impact on the health of the individual | 1. Tell me what you understand about TB.     Probes: Ask about participants’ understanding of   - TB signs and symptoms - How TB is spread - How TB is prevented - How TB is treated - Where to seek care. - if the patient has heard about hidden TB? - if the patient knows who is more likely to get ‘hidden TB’ |
| 1. Do you know how someone can tell if you have ‘hidden TB’/ ‘sleeping TB’ |
| 1. Do you know if there is any treatment to treat hidden TB to prevent it from becoming active TB?   If yes, how long is the treatment taken? Are they tablets? Injections? what is the formulation? |
| **Ability to seek** | Relates to cultural and social factors determining the possibility for people to accept the aspects of the service and the judged appropriateness for the persons | 1. What are community perceptions about people with ‘hidden TB’   Probe:   - How did you feel about having ‘hidden TB’ while in the community? |
| 1. Do you feel taking these TB medicine to prevent TB is worthwhile? Is it helpful? Is there any benefit? |
| 1. Is it easy or difficult is it to take these medicines? |
| **Ability to reach** | Refer to the fact that health services (either the physical space or those working in health care roles) can be reached both physically and in a timely manner. | 1. Could you please tell us about your experience in receiving TPT at the health facility?   Probe   - about experience during TB screening activities - for experience that led to an LTBI diagnosis. How long did it take? Availability of diagnostics like x-rays and lab tests |
| 1. How easy was it to access LTBI treatment? |
| **Ability to pay** | Reflects the economic capacity for people to spend resources and time to use appropriate services. | 1. Did you incur any medical expenses to receive TPT? |

for willingness to pay for LTBI services in case the patient received free treatment

|  |  | Probe:   - If yes, how much in total do people spend on medical expenses? - What costs did you incur in treating LTBI diseases? - What are the costs of investigations for LTBI? - Do you feel the associated medical expenses are affordable? Why/Why not? |
| --- | --- | --- |
| **Ability to engage** | Denotes the fit between services and clients need, its timeliness, the amount of care spent in assessing health problems and determining the correct treatment and the technical and interpersonal quality of the services provided | 1. What is your opinion of your healthcare worker?   Probes;   - Do you feel they give you appropriate advice? Why/not? - Do you feel like they understand your concerns and respond to your questions? - Do you feel like they understand your concerns? Why/not? |
| 1. Do you face any difficulties going to see the health worker? |
| **Recommendation(s)** |  | 1. What can be done to improve access to care for hidden TB |
